# Supplementary material
Source: PubMed Central journal article supplement (PMC10574140)
Supplement: NIHMS1928466-supplement-Supplementary_Table_1.pdf [file NIHMS1928466-supplement-Supplementary_Table_1.pdf]

Supplementary Table 1 Immune Checkpoint Correlation Analysis

| ICs      | -Log10(p value[PTEN-defect]) | -Log10(p value[TP53-defect]) | LOG2(RNA Seq V2 RSEM [PTEN/TP53-defect][+1]) |
|----------|------------------------------|------------------------------|----------------------------------------------|
| CTLA4    | 0.16274694                   | 0.15774053                   | 4.53911825                                   |
| PDCD1    | 0.42568078                   | 0.07056209                   | 4.5296151                                    |
| CD274    | 0.31612947                   | 0.17522777                   | 3.57483181                                   |
| PDCD1LG2 | 0.47690639                   | 0.28185584                   | 4.29042482                                   |
| VSIR     | 2.38305618                   | 1.90659762                   | 9.04673555                                   |
| BTLA     | 0.16014338                   | 0.16191527                   | 3.44003963                                   |
| TIGIT    | 0.11316293                   | 0.04156661                   | 5.08626688                                   |
| CD96     | 0.00379718                   | 0.00420894                   | 6.19159193                                   |
| HAVCR2   | 0.3072053                    | 0.77643146                   | 6.78448512                                   |
| TIMD4    | 2.56241391                   | 1.74788235                   | 2.63033858                                   |
| CD244    | 0.76876112                   | 0.10822276                   | 3.37851672                                   |
| SLAMF6   | 0.0829356                    | 0.06477844                   | 5.66454329                                   |
| LAIR1    | 0.1941533                    | 0.1549567                    | 7.41758756                                   |
| LAG3     | 1.93710133                   | 0.29162258                   | 5.74946782                                   |
| CD160    | 3.76179554                   | 0.72971056                   | 3.06481164                                   |
| TNFRSF21 | 5.13252821                   | 1.45703082                   | 10.7009693                                   |
| CD47     | 0.18243226                   | 0.82962531                   | 11.5148767                                   |
| NT5E     | 1.22949054                   | 1.10619968                   | 7.82217949                                   |
| CD276    | 20.6534106                   | 8.08234505                   | 11.9987608                                   |
| VTCN1    | 1.37110976                   | 0.87331387                   | 5.91647811                                   |
| KIR3DL1  | 0.08123736                   | 0.03229961                   | 0.49513433                                   |
| TNFRSF18 | 0.75299224                   | 1.82593769                   | 5.66592201                                   |
| LY9      | 0.06040417                   | 0.04552212                   | 4.76082092                                   |
| CD28     | 1.35426183                   | 1.15488123                   | 5.34422538                                   |
| CD80     | 0.67875117                   | 1.04413536                   | 2.91951259                                   |
| CD86     | 0.11023468                   | 0.43928618                   | 6.41972868                                   |
| ICOS     | 0.07725845                   | 0.23517343                   | 3.92688092                                   |
| ICOSLG   | 0.20340828                   | 0.21757632                   | 8.13316773                                   |
| CD226    | 0.65387014                   | 0.82102689                   | 3.78897003                                   |
| CRTAM    | 0.14845963                   | 0.05311567                   | 3.56771623                                   |
| HAVCR1   | 0.36562405                   | 0.29920841                   | 0.3676252                                    |
| CD2      | 0.04213605                   | 0.00742873                   | 7.13018248                                   |
| CD48     | 0.03985347                   | 0.13765503                   | 7.23804191                                   |
| CD58     | 2.15058495                   | 0.7584577                    | 7.02287027                                   |
| SLAMF1   | 0.03082465                   | 0.00552926                   | 4.22054469                                   |
| CD84     | 0.78148857                   | 0.27604837                   | 5.40611143                                   |
| SLAMF7   | 0.00441333                   | 0.10998709                   | 6.67902009                                   |
| TNFRSF9  | 0.05592382                   | 0.08662368                   | 2.38786007                                   |
| TNFSF9   | 1.40827986                   | 0.36562682                   | 3.5369351                                    |
| TNFRSF4  | 0.48760906                   | 0.17501622                   | 4.80128865                                   |
| TNFSF4   | 1.45227202                   | 0.99548258                   | 6.56032354                                   |
| CD27     | 0.10414941                   | 0.04184867                   | 6.28584158                                   |
| CD70     | 1.28202848                   | 0.2023421                    | 1.81780332                                   |
| TNFRSF8  | 0.57853388                   | 0.26176458                   | 3.04349378                                   |
| TNFRSF14 | 0.01077391                   | 0.17134679                   | 10.9072119                                   |
| TNFSF14  | 0.14487808                   | 0.12790467                   | 2.1415442                                    |
| LTBR     | 0.446262                     | 0.62377149                   | 11.5658961                                   |
| TNFRSF25 | 1.31167398                   | 0.36611955                   | 5.34525576                                   |
| TNFSF15  | 0.08885908                   | 1.43702934                   | 5.49556723                                   |
| TNFRSF6B | 0.86120542                   | 0.48739326                   | 5.64799253                                   |
| CD40     | 3.23936698                   | 2.48519172                   | 7.67760042                                   |
| CD40LG   | 0.57091779                   | 0.12106337                   | 4.23258256                                   |
| IL2RB    | 0.15204204                   | 0.09916886                   | 7.33567095                                   |
