# Supplementary material
Source: PubMed Central journal article supplement (PMC10574140)
Supplement: NIHMS1928466-supplement-Supplementary_Table_2.pdf [file NIHMS1928466-supplement-Supplementary_Table_2.pdf]

Supplementary Table 2. B7-H3-p53 and PTEN pathway gene analysis

| GH15J074539 Promoter/Enhancer (n=262) |         |         |         | GH15J073682 Promoter/Enhancer (n=146) |         | GH15J073695 Enhancer (n=64) | Putative Transcriptional Regulators of B7-H3 (Overlapped genes in three datasets) n=27 |
|---------------------------------------|---------|---------|---------|---------------------------------------|---------|-----------------------------|----------------------------------------------------------------------------------------|
| HCFC1                                 | ATF1    | MEIS2   | PHF8    | ZNF580                                | ARID1B  | ZIC2                        | SP1                                                                                    |
| SP1                                   | CREM    | ELF3    | ATF7    | ATF2                                  | ARID4B  | ZNF600                      | POLR2A                                                                                 |
| POLR2A                                | ZNF843  | ZFX     | GATAD2B | KLF17                                 | ZNF687  | BCL11A                      | ZIC2                                                                                   |
| DPF2                                  | SUPT5H  | ZNF133  | RUNX3   | JUND                                  | CREB1   | MNT                         | ZNF600                                                                                 |
| ZNF580                                | KDM5A   | PHF20   | CBX3    | NCOR1                                 | ZNF644  | ELF1                        | BCL11A                                                                                 |
| KLF17                                 | ZBTB48  | SP7     | EP300   | POLR2A                                | ZNF324  | TAF9B                       | SIN3A                                                                                  |
| SIX5                                  | ZNF146  | HDAC1   | ZSCAN18 | ZIC2                                  | HLF     | ETS1                        | ELF1                                                                                   |
| NCOR1                                 | ZBTB40  | ZNF548  | NBN     | ZNF600                                | ATF3    | SP2                         | SP2                                                                                    |
| ZNF184                                | SPI1    | GATA2   | PAX8    | HIC1                                  | PHF21A  | MAFF                        | PRDM10                                                                                 |
| ZIC2                                  | HDAC2   | KLF5    | POLR2B  | ZBTB10                                | SP3     | SIN3A                       | TCF12                                                                                  |
| ZNF600                                | BCL11B  | GABPB1  | KLF8    | NFIC                                  | ZBTB8A  | GABPA                       | IKZF1                                                                                  |
| BCL11A                                | MYC     | ZNF366  | TCF7    | CTCF                                  | ZSCAN4  | ZNF316                      | RAD21                                                                                  |
| YY1                                   | TAF1    | KLF1    | ETV6    | UBTF                                  | ZNF660  | EBF1                        | ATF2                                                                                   |
| HIC1                                  | PRDM6   | ZBED1   | RELB    | ZMYM3                                 | GATAD2B | NFE2                        | GLIS1                                                                                  |
| ZBTB10                                | ZBTB1   | ZNF561  | TSHZ1   | ZNF217                                | ZXDB    | MAFK                        | KLF1                                                                                   |
| NFIC                                  | PKNOX1  | ARID1B  | LEF1    | ZNF639                                | EGR2    | KLF16                       | KDM1A                                                                                  |
| DEK                                   | ZSCAN23 | ARID4B  | ZBTB20  | ZEB1                                  | ZEB2    | SPI1                        | ZBTB8A                                                                                 |
| ZNF207                                | PRDM10  | ZNF785  | REPIN1  | KDM6A                                 | HNRNP   | ZNF318                      | EGR2                                                                                   |
| CTCF                                  | BATF    | ZNF792  | GATAD2A | CHD4                                  | FOS     | MYC                         | KLF16                                                                                  |
| RCOR1                                 | ZNF624  | ZBTB7A  | CC2D1A  | ELF1                                  | ZNF629  | MAX                         | FOS                                                                                    |
| MAZ                                   | MLLT1   | E2F4    | BCOR    | SAP130                                | XRCC5   | BATF                        | PATZ1                                                                                  |
| MBD2                                  | ZNF24   | KLF10   | ARNT    | KLF9                                  | ZNF692  | ZNF189                      | GLIS2                                                                                  |
| NONO                                  | ZNF189  | YY2     | HMBX1   | CUX1                                  | CBFA2T2 | MAFG                        | ZBTB17                                                                                 |
| TRIM22                                | SCRT1   | CREB1   | ZBTB11  | FEZF1                                 | MTA1    | JUND                        | EP300                                                                                  |
| ELK1                                  | SMARCA4 | ZNF324  | RBFOX2  | SP2                                   | PATZ1   | SRF                         | ZBTB11                                                                                 |
| MNT                                   | NRF1    | TBL1XR1 | ZNF23   | ZBTB7B                                | CHD2    | POLR2A                      | ZFHX2                                                                                  |
| HES1                                  | ZNF2    | CHD1    | CBFA2T3 | THAP11                                | RNF2    | IKZF1                       | ZNF335                                                                                 |
| SIN3A                                 | PAX5    | CTBP1   | ZBTB25  | RXRA                                  | KAT8    | RAD21                       |                                                                                        |
| ZNF341                                | NCOA1   | ATF3    | ZNF423  | SMAD4                                 | TRIM24  | ATF2                        |                                                                                        |
| TBP                                   | ZEB2    | ZSCAN21 | ZFHX2   | SIN3A                                 | ZNF24   | GLIS1                       |                                                                                        |
| ZSCAN16                               | SRF     | KDM1A   | ZNF747  | TCF7L2                                | IRF2    | ZBTB40                      |                                                                                        |
| ZNF217                                | TCF12   | SP3     | ZSCAN5C | TAL1                                  | CTBP1   | SP1                         |                                                                                        |
| ZNF639                                | SMARCE1 | ZBTB8A  | PML     | FOSL2                                 | ZNF239  | ZNF16                       |                                                                                        |
| MAX                                   | INSM2   | ZSCAN4  | PBX2    | DRAP1                                 | IKZF1   | GABPB1                      |                                                                                        |
| NR2C1                                 | DIDO1   | ZXDB    | HDGF    | GLI4                                  | GF1B    | KLF1                        |                                                                                        |
| ZEB1                                  | REST    | TARDBP  | EMSY    | THRB                                  | MYNN    | KLF10                       |                                                                                        |
| ZNF223                                | IKZF1   | EGR2    | ZNF37A  | RAD21                                 | ZNF704  | TBL1XR1                     |                                                                                        |
| KLF7                                  | RB1     | GTF2F1  | PRDM1   | ZBTB48                                | GLIS2   | ZBTB8A                      |                                                                                        |
| KMT2B                                 | ZFP37   | KLF16   | ZBTB26  | KLF16                                 | ZBTB17  | DACH1                       |                                                                                        |
| MXD4                                  | EGR1    | FOS     | ZNF444  | BCL11B                                | TARDBP  | EGR2                        |                                                                                        |
| SMAD5                                 | ZNF547  | ZNF629  | SCRT2   | STAT5A                                | SOX6    | NFE2L2                      |                                                                                        |
| ELF1                                  | GATAD1  | RBAK    | SREBF2  | PRDM6                                 | ZNF579  | PATZ1                       |                                                                                        |
| TAF9B                                 | HBP1    | ZNF692  | ZNF335  | PRDM10                                | ZBTB6   | OSR2                        |                                                                                        |
| BHLHE40                               | HMG20B  | CBFA2T2 | BCLAF1  | KDM1A                                 | TAF1    | IKZF2                       |                                                                                        |
| SAP130                                | RAD21   | ZNF221  | MIER1   | TCF12                                 | BCL11A  | PRDM10                      |                                                                                        |
| KLF9                                  | TAF7    | KDM4B   | E2F1    | SMARCE1                               | SMC3    | GLIS2                       |                                                                                        |
| ETS1                                  | CBLL2   | PATZ1   | ZBTB44  | INSM2                                 | PHF8    | ZBTB17                      |                                                                                        |
| ZNF610                                | MTA3    | MTA2    | MGA     | HNF4A                                 | TRIM22  | EED                         |                                                                                        |
| SP2                                   | MAFK    | CHD2    | WT1     | EGR1                                  | EP300   | ZNF280C                     |                                                                                        |
| RFX5                                  | ATF2    | OSR2    | UBTF    | ZNF664                                | ZSCAN18 | TCF12                       |                                                                                        |
| MIER3                                 | ZNF518A | RNF2    | TAL1    | HMG20A                                | KLF8    | EP300                       |                                                                                        |
| IRF4                                  | ZSCAN29 | IKZF2   | TFDP1   | MTA2                                  | LEF1    | RUNX3                       |                                                                                        |
| ZBTB7B                                | JUNB    | KAT8    | ZNF512B | DPF2                                  | ZBTB20  | NBN                         |                                                                                        |
| ZNF513                                | NFYC    | TRIM24  | ZNF501  | RBPJ                                  | BCOR    | ETV6                        |                                                                                        |
| DEAF1                                 | STAT1   | LARP7   | ELF4    | BHLHE40                               | ZNF777  | ELK1                        |                                                                                        |
| NKRF                                  | BACH1   | IRF2    |         | NR2F6                                 | ZBTB11  | FOS                         |                                                                                        |
| GABPA                                 | ZBTB21  | ZNF558  |         | ZBTB21                                | RBFOX2  | ZBTB11                      |                                                                                        |
| SMC3                                  | AEBP2   | MZF1    |         | GLIS1                                 | CBFA2T3 | NR2F2                       |                                                                                        |
| THAP11                                | GLIS1   | ZNF239  |         | ZNF398                                | ZBTB25  | ZNF423                      |                                                                                        |
| SMARCA5                               | STAT3   | GF1B    |         | TEAD4                                 | SMARCA5 | ZFHX2                       |                                                                                        |
| SIN3B                                 | PRDM4   | MYNN    |         | ZFP69B                                | CHD1    | KDM1A                       |                                                                                        |
| ZNF316                                | ZNF398  | IRF3    |         | ZNF652                                | ZFHX2   | MLLT1                       |                                                                                        |
| EBF1                                  | TEAD4   | ZNF704  |         | RXRBR                                 | PML     | EMSY                        |                                                                                        |
| DDX20                                 | ZNF18   | E2F8    |         | IKZF5                                 | SKI     | ZNF335                      |                                                                                        |
| CBFB                                  | ZFP69B  | GLIS2   |         | ZFX                                   | HDAC2   |                             |                                                                                        |
| TCF7L2                                | ZNF837  | ZBTB17  |         | CREM                                  | PRDM1   |                             |                                                                                        |
| ETV4                                  | GLI4    | RXRA    |         | SP1                                   | SMARCA4 |                             |                                                                                        |
| FOSL2                                 | ZSCAN5A | ZNF143  |         | JUNB                                  | ZBTB26  |                             |                                                                                        |
| ZNF433                                | BCL6    | EED     |         | SP7                                   | ZNF444  |                             |                                                                                        |
|                                       |         |         |         | GATA2                                 | SCRT2   |                             |                                                                                        |
|                                       |         |         |         | ZNF366                                | ZNF335  |                             |                                                                                        |
|                                       |         |         |         | KLF1                                  | NR2F1   |                             |                                                                                        |
|                                       |         |         |         | ZNF561                                | ERF     |                             |                                                                                        |
