# Supplementary material
Source: PubMed Central journal article supplement (PMC10574140)
Supplement: NIHMS1928466-supplement-Supplementary_Table_3.pdf [file NIHMS1928466-supplement-Supplementary_Table_3.pdf]

Supplementary Table 3. CyTOF Antibody Panels

| Regular CyTOF Panel |                            |                        |              |              |            |            |
|---------------------|----------------------------|------------------------|--------------|--------------|------------|------------|
|                     | TaggedAbs.description      | Target                 | label        | Source       | cat        | RRID       |
| Surface Ab          | Ly-6G 141Pr                | Ly-6G                  | 141Pr        | DVS-Fluidigm | 3141008B   | AB_2814678 |
|                     | CD11c(Ms) 142Nd            | CD11c                  | 142Nd        | DVS-Fluidigm | 3142003B   | AB_2814737 |
|                     | CD115(Ms) 144Nd            | CD115                  | 144Nd        | DVS-Fluidigm | 3144012B   | AB_2895116 |
|                     | CD4(Ms) 145Nd (MDA)        | CD4(Ms)                | 145Nd        | BioLegend    | 100506     | AB_312709  |
|                     | CD8a(Ms) 146Nd (MDA)       | CD8a                   | 146Nd        | BioLegend    | 100702     | AB_312741  |
|                     | CD45(Ms) 147Sm             | CD45(Ms)               | 147Sm        | DVS-Fluidigm | 3147003B   | AB_2811243 |
|                     | CD11b 148Nd                | CD11b                  | 148Nd        | DVS-Fluidigm | 3148003B   | AB_2814738 |
|                     | CD25(Ms) 150Nd (MDA)       | CD25                   | 150Nd        | BioLegend    | 101902     | AB_312845  |
|                     | CD3e 152Sm (MDA)           | CD3, CD3e              | 152Sm        | BioLegend    | 100302     | AB_312667  |
|                     | CD274(Ms) 153Eu (MDA)      | CD274, PD-L1           | 153Eu        | BioLegend    | 124303     | AB_961230  |
|                     | CD209B(Ms) 155Gd           | CD209B                 | 155Gd        | BioLegend    | 147802     | AB_2563446 |
|                     | TCRb(Ms) 156Gd             | TCR beta               | 156Gd        | BioLegend    | 109201     | AB_313424  |
|                     | CXCR4(Ms) 159Tb            | CD184, CXCR4           | 159Tb        | DVS-Fluidigm | 3159030B   | N/A        |
|                     | CD183(Ms) 161Dy            | CD183, CXCR3           | 161Dy        | BioLegend    | 126502     | AB_1027635 |
|                     | Ly-6C 162Dy                | Ly-6C                  | 162Dy        | DVS-Fluidigm | 3162014B   | AB_2922921 |
|                     | CD152(Ms) 163Dy            | CD152, CTLA-4          | 163Dy        | BioLegend    | 106202     | AB_313247  |
|                     | NK1.1(Ms) 170Er            | NK1.1, CD161b/c, Ly-55 | 170Er        | DVS-Fluidigm | 3170002B   | AB_2885023 |
|                     | CD279(Ms) 171Yb (29F.1A12) | CD279, PD-1            | 171Yb        | BioLegend    | 135202     | AB_1877121 |
|                     | CD86(Ms) 172Yb             | CD86                   | 172Yb        | DVS-Fluidigm | 3172016B   | AB_2922923 |
|                     | F4/80 173Yb                | F4/80                  | 173Yb        | BioLegend    | 123102     | AB_893506  |
| CD326(Ms) 174Yb     | CD326 (Ms)                 | 174Yb                  | BioLegend    | 118201       | AB_1089026 |            |
| B220 176Yb          | B220, CD45R                | 176Yb                  | BioLegend    | 103202       | AB_312987  |            |
| I-A/I-E 209Bi       | I-A/I-E, MHC-II            | 209Bi                  | DVS-Fluidigm | 3209006B     | AB_2885025 |            |
| Intracellular Ab    | Vimentin 154Sm             | Vimentin               | 154Sm        | DVS-Fluidigm | 3154014A   | N/A        |
|                     | Foxp3(Ms) 158Gd            | Foxp3                  | 158Gd        | DVS-Fluidigm | 3158003A   | AB_2814740 |
|                     | Arginase-1 166Er (MDA)     | Arg-1, Arginase-1      | 166Er        | BioLegend    | 678802     | AB_2566051 |
|                     | Ki67 168Er                 | Ki67                   | 168Er        | BD           | 556003     | AB_396287  |
|                     | CD206(Ms) 169Tm            | CD206, MMR             | 169Tm        | DVS-Fluidigm | 3169021B   | AB_2832249 |

| T cell-focused CyTOF Panel |                            |                        |              |              |             |             |
|----------------------------|----------------------------|------------------------|--------------|--------------|-------------|-------------|
|                            | TaggedAbs.description      | Target                 | label        | Source       | cat         | RRID        |
| Surface Ab                 | CD45(Ms) 89Y               | CD45(Ms)               | 89Y          | DVS-Fluidigm | 3089005B    | AB_2651152  |
|                            | Ly-6G 141Pr                | Ly-6G                  | 141Pr        | DVS-Fluidigm | 3141008B    | AB_2814678  |
|                            | TCRb(Ms) 143Nd             | TCR                    | 143Nd        | DVS-Fluidigm | 3143010B    | N/A         |
|                            | CD4(Ms) 145Nd (MDA)        | CD4(Ms)                | 145Nd        | BioLegend    | 100506      | AB_312709   |
|                            | CD8a(Ms) 146Nd (MDA)       | CD8a                   | 146Nd        | BioLegend    | 100702      | AB_312741   |
|                            | CD223(Ms) 147Sm            | CD223, LAG-3           | 147Sm        | BioLegend    | 125202      | AB_961187   |
|                            | CD11b 148Nd                | CD11b                  | 148Nd        | DVS-Fluidigm | 3148003B    | AB_2814738  |
|                            | CD25(Ms) 150Nd (MDA)       | CD25                   | 150Nd        | BioLegend    | 101902      | AB_312845   |
|                            | TIGIT(Ms) 151Eu            | TIGIT, Vstm3           | 151Eu        | BioLegend    | 142102      | AB_10960124 |
|                            | CD3e 152Sm (MDA)           | CD3, CD3e              | 152Sm        | BioLegend    | 100302      | AB_312667   |
|                            | CD274(Ms) 153Eu (MDA)      | CD274, PD-L1           | 153Eu        | BioLegend    | 124303      | AB_961230   |
|                            | CD11c(Ms) 154Sm            | CD11c                  | 154Sm        | Tonbo        | 70-0114-U10 | N/A         |
|                            | F4/80 159Tb (MDA)          | F4/80                  | 159Tb        | BioLegend    | 123102      | AB_893506   |
|                            | TCRgd(Ms) 160Gd            | TCRgd                  | 160Gd        | eBioscience  | 14-5711-82  | AB_467569   |
|                            | CD279(Ms) 161Dy (29F.1A12) | CD279, PD-1            | 161Dy        | BioLegend    | 135202      | AB_1877121  |
|                            | TIM-3(Ms) 162Dy            | TIM3, CD366            | 162Dy        | DVS-Fluidigm | 3162029B    | N/A         |
|                            | CD152(Ms) 163Dy            | CD152, CTLA-4          | 163Dy        | BioLegend    | 106202      | AB_313247   |
|                            | NK1.1(Ms) 170Er            | NK1.1, CD161b/c, Ly-55 | 170Er        | DVS-Fluidigm | 3170002B    | AB_2885023  |
|                            | CD80(Ms) 171Yb             | CD80                   | 171Yb        | DVS-Fluidigm | 3171008B    | AB_2885024  |
|                            | B220 176Yb                 | B220, CD45R            | 176Yb        | BioLegend    | 103202      | AB_312987   |
| Intracellular Ab           | VISTA 142Nd (IMC)          | VISTA                  | 142Nd        | CST          | 54979BF     | AB_2799474  |
|                            | IL-2(Ms) 144Nd             | IL-2                   | 144Nd        | DVS-Fluidigm | 3144002B    | N/A         |
|                            | Foxp3(Ms) 158Gd            | Foxp3                  | 158Gd        | DVS-Fluidigm | 3158003A    | AB_2814740  |
|                            | IFNg(Ms) 165Ho             | IFNg                   | 165Ho        | DVS-Fluidigm | 3165003B    | AB_2925174  |
|                            | IL-4(Ms) 166Er             | IL-4                   | 166Er        | DVS-Fluidigm | 3166003B    | N/A         |
|                            | GFP 169Tm                  | GFP                    | 169Tm        | DVS-Fluidigm | 3169009B    | AB_2814899  |
| Granzyme B 173Yb           | Granzyme B                 | 173Yb                  | DVS-Fluidigm | 3173006B     | AB_2811095  |             |
