# Supplementary material
Source: PubMed Central journal article supplement (PMC10574140)
Supplement: NIHMS1928466-supplement-Supplementary_Table_4.pdf [file NIHMS1928466-supplement-Supplementary_Table_4.pdf]

Supplementary Table 4. Full list of antibodies

| Antibody Name                                                   | Reactivity                                                                                       | Vender                    | Catalog number | RRID        | Application                              |
|-----------------------------------------------------------------|--------------------------------------------------------------------------------------------------|---------------------------|----------------|-------------|------------------------------------------|
| Mouse B7-H3 Antibody                                            | Mouse                                                                                            | R&D                       | AF1397         | AB_2291195  | Immunohistochemistry (IHC), Western blot |
| Phospho-Akt (Ser473) (D9E) XP® Rabbit mAb                       | Human/Mouse/Rat/Hamster/Monkey/D.melanogaster/Zebrafish/Bovine                                   | Cell Signaling Technology | 4060S          | AB_2315049  | Immunohistochemistry (IHC), Western blot |
| Ki-67 Recombinant Rabbit Monoclonal Antibody (SP6)              | Human/Mouse/Non-human primate/Rat                                                                | Thermo Fisher Scientific  | MA5-14520      | AB_10979488 | Immunohistochemistry (IHC)               |
| Cleaved Caspase-3 (Asp175) Antibody #9661                       | Human/Mouse/Rat/Monkey                                                                           | Cell Signaling Technology | 9661S          | AB_2341188  | Immunohistochemistry (IHC)               |
| CD8α (D4W2Z) XP® Rabbit mAb (Mouse Specific) #98941             | Mouse                                                                                            | Cell Signaling Technology | 98941S         | AB_2756376  | Immunofluorescence (IF), Multiplex IHC   |
| Mouse PD-1 Antibody                                             | Mouse                                                                                            | R&D                       | AF1021         | AB_354541   | Immunofluorescence (IF), Multiplex IHC   |
| Recombinant Anti-CD4 antibody [EPR19514]                        | Mouse                                                                                            | Abcam                     | ab183685       | AB_2686917  | Immunofluorescence (IF), Multiplex IHC   |
| FOXP3 Monoclonal Antibody (NRRF-30)                             | Mouse                                                                                            | Thermo Fisher Scientific  | 14-4771-80     | AB_529583   | Immunofluorescence (IF), Multiplex IHC   |
| Purified anti-mouse NK-1.1 Antibody                             | Mouse                                                                                            | BioLegend                 | 108701         | AB_313388   | Immunofluorescence (IF)                  |
| IL-4 Monoclonal antibody                                        | Human/Mouse/Rat                                                                                  | Proteintech               | 66142-1-Ig     | AB_2881539  | Multiplex IHC                            |
| Granzyme B (ESV2L) Rabbit mAb (Mouse Specific) #44153           | Mouse                                                                                            | Cell Signaling Technology | 44153S         | AB_2857976  | Multiplex IHC                            |
| IFN gamma Polyclonal Antibody                                   | Human/Mouse/Rat                                                                                  | Bioss                     | bs-0480R       | AB_10857066 | Multiplex IHC                            |
| TIM-3 (D3M9R) XP® Rabbit mAb (Mouse Specific) #83882            | Mouse                                                                                            | Cell Signaling Technology | 83882T         | AB_2800033  | Multiplex IHC                            |
| LAG-3 Polyclonal antibody                                       | Human/Mouse/Rat                                                                                  | Proteintech               | 16616-1-AP     | AB_2133350  | Multiplex IHC                            |
| Human B7-H3 Antibody                                            | Human                                                                                            | R&D                       | AF1027         | AB_354546   | Western blot                             |
| Monoclonal Anti-β-Actin antibody produced in mouse              | Pig/Hirudo medicinalis/bovine/rat/canine/feline/human/rabbit/carp/mouse/guinea pig/chicken/sheep | Sigma-Aldrich             | A5441-.2ML     | AB_476744   | Western blot                             |
| p53 Antibody (DO-1)                                             | Human                                                                                            | Santa Cruz Biotechnology  | sc-126         | AB_628082   | Western blot                             |
| PTEN (D4.3) XP® Rabbit mAb                                      | Human/Mouse/Rat/Monkey/Dog                                                                       | Cell Signaling Technology | 9188S          | AB_2253290  | Western blot                             |
| Akt (pan) (C67E7) Rabbit mAb                                    | Human/Mouse/Rat/Monkey/D.melanogaster                                                            | Cell Signaling Technology | 4691S          | AB_915783   | Western blot                             |
| SP1 (D4C3) Rabbit mAb                                           | Human/Monkey                                                                                     | Cell Signaling Technology | 9389S          | AB_11220235 | Western blot                             |
| c-Myc (E5Q6W) Rabbit mAb #18583                                 | Human/Mouse/Rat                                                                                  | Cell Signaling Technology | 18583S         | AB_2895543  | Western blot                             |
| APC anti-mouse CD8a Antibody                                    | Mouse                                                                                            | BioLegend                 | 100711         | AB_312750   | Flow cytometry                           |
| Brilliant Violet 605™ anti-mouse CD279 (PD-1) Antibody          | Mouse                                                                                            | BioLegend                 | 135220         | AB_2562616  | Flow cytometry                           |
| APC/Fire™ 750 anti-mouse CD366 (Tim-3) Antibody                 | Mouse                                                                                            | BioLegend                 | 119737         | AB_2810367  | Flow cytometry                           |
| PE/Cyanine7 anti-mouse CD223 (LAG-3) Antibody                   | Mouse                                                                                            | BioLegend                 | 125225         | AB_2715763  | Flow cytometry                           |
| InVivoMAb anti-mouse CD276 (B7-H3)                              | Mouse                                                                                            | Bio X Cell                | BE0124         | AB_10950149 | In vivo treatment                        |
| InVivoMAb rat IgG1 isotype control, anti-horseradish peroxidase | Isotype control                                                                                  | Bio X Cell                | BE0088         | AB_1107775  | In vivo treatment                        |
| InVivoMAb anti-mouse PD-1 (CD279)                               | Mouse                                                                                            | Bio X Cell                | BE0273         | AB_2687796  | In vivo treatment                        |
| InVivoMAb anti-mouse PD-L1 (B7-H1)                              | Mouse                                                                                            | Bio X Cell                | BE0101         | AB_10949073 | In vivo treatment                        |
| InVivoMAb anti-mouse CTLA-4 (CD152)                             | Mouse                                                                                            | Bio X Cell                | BE0131         | AB_10950184 | In vivo treatment                        |
| InVivoMAb rat IgG2a isotype control, anti-trinitrophenol        | Isotype control                                                                                  | Bio X Cell                | BE0089         | AB_1107769  | In vivo treatment                        |
