# Supplementary material
Source: PubMed Central journal article supplement (PMC10574140)
Supplement: NIHMS1928466-supplement-Supplementory_Figures_1-6.pdf [file NIHMS1928466-supplement-Supplementory_Figures_1-6.pdf]

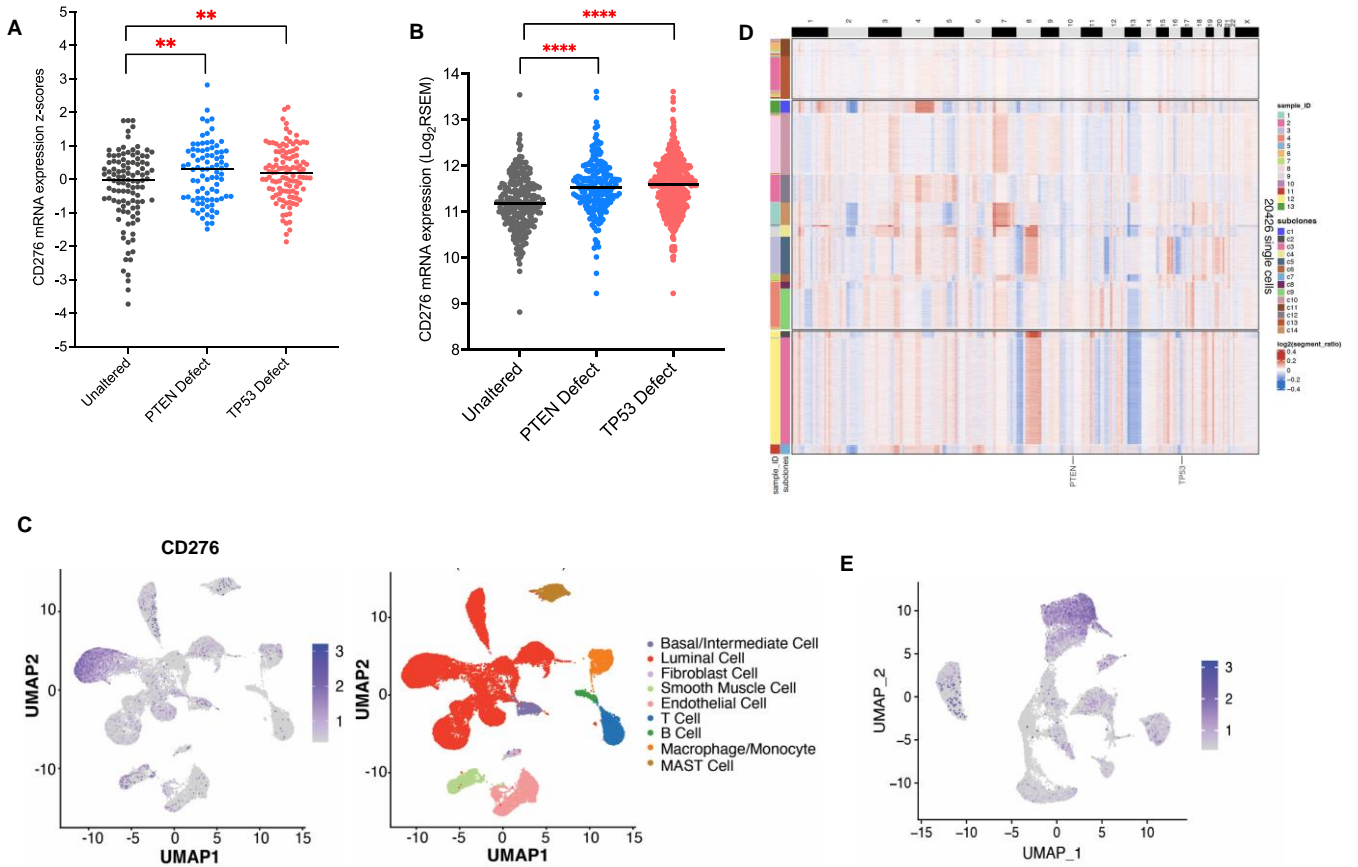

**Figure S1. B7-H3(CD276) expression is elevated in tumors with *PTEN* and *TP53* defects**

(A,B) CD276 mRNA expression in metastatic prostate cancer (A, SU2C/PCF dataset) and invasive breast cancer (B, TCGA dataset) containing *PTEN* and/or *TP53* defects. One-way ANOVA with Tukey's post hoc tests was performed using GraphPad Prism version 9.2.0.. \*\*  $P < 0.01$ , \*\*\*\*  $P < 0.0001$ . (C) Single-cell transcriptional profiling showed the expression pattern of *CD276* in human prostate tumors (Chen *et al.*, 2021 (41);  $n=12$  patients). UMAP plots of *CD276* gene expression (left) and cell type annotation (right) are shown. (D,E) The CopyKat inferred copy number segmentation of luminal cells heatmap (D) and *CD276* gene expression pattern in 14 luminal cell subclones (E).

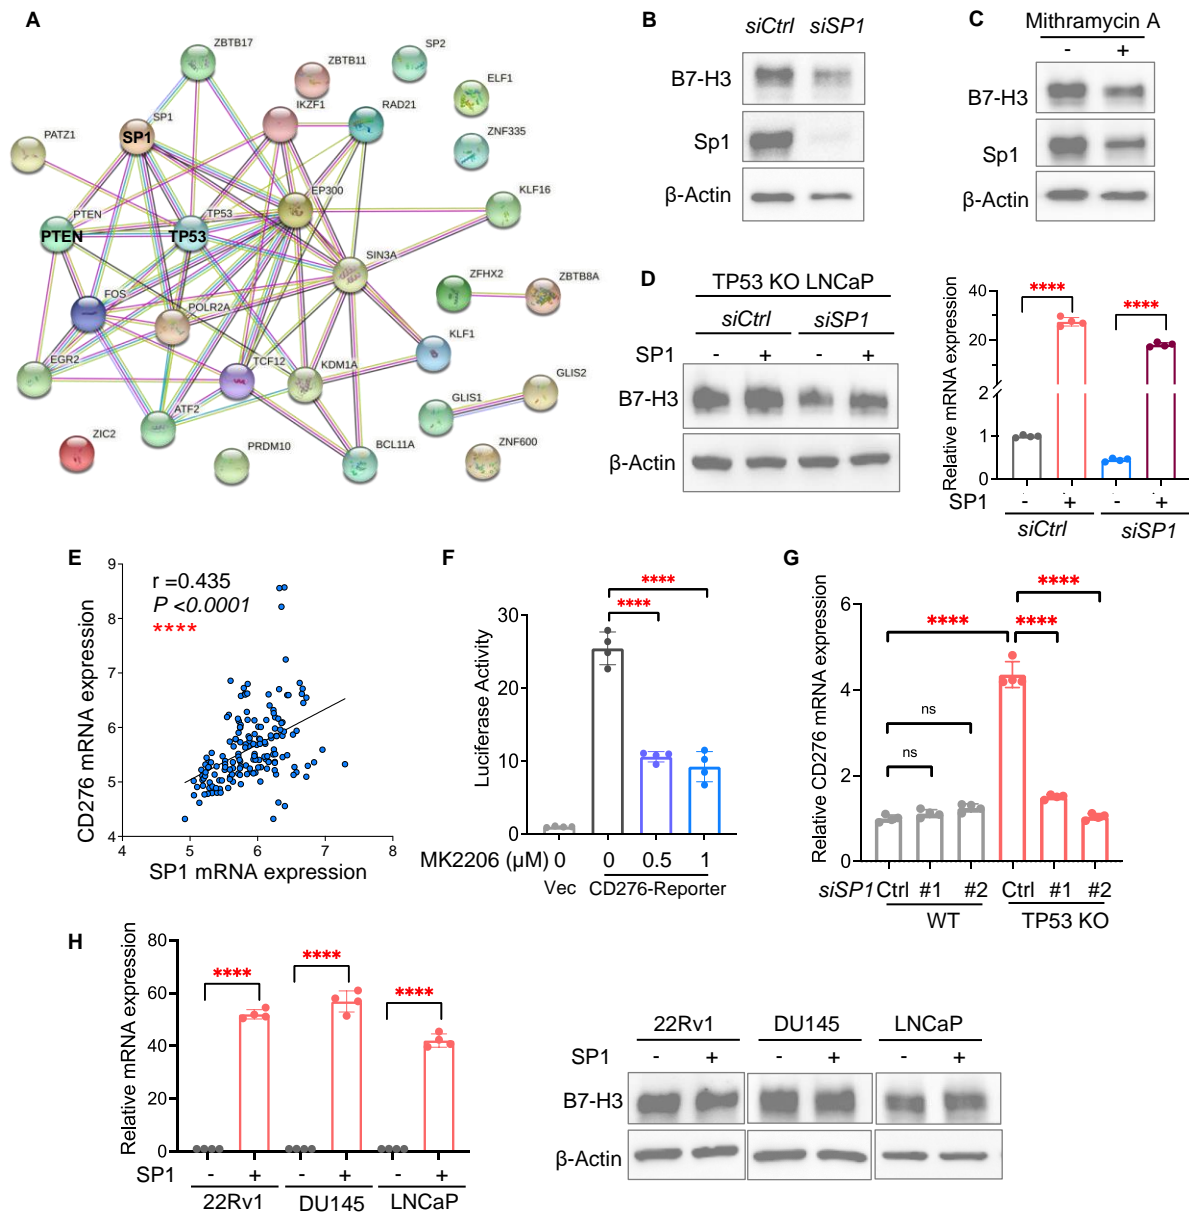

**Figure S2. Loss of *PTEN* and *TP53* upregulates B7-H3(CD276) by activating Sp1**

(A) 27 putative transcriptional regulators of B7-H3 were found in the GeneHancer database. Their protein-protein interaction network with PTEN and p53 was analyzed using STRING (Search Tool for the Retrieval of Interacting Genes/Proteins). (B) PTEN/p53-deficient LNCaP cells (PTEN-null; TP53 knockout (KO)) were transfected with siRNA targeting *SP1* or scrambled control, followed by western blot analysis. (C) PTEN/p53-deficient LNCaP cells were treated with 20 nM Sp1 inhibitor, mithramycin A, followed by western blot analysis. (D) PTEN/p53-deficient LNCaP cells were transfected with siRNA targeting *SP1* or scrambled control, followed by overexpressing SP1. B7-H3 protein was determined by western blot (left), and SP1 expression was determined by qPCR (right;  $n = 4$  per group). (E) Pearson correlation between *SP1* and *CD276* mRNA in human

metastatic prostate tumors (*Brady et al., 2021[29]*). The Pearson correlation coefficient ( $r$ ) and p-value are shown. **(F)** Dual luciferase assay of *CD276*-Reporter in LNCaP cells treated with MK2206 or DMSO ( $n = 4$  per group). **(G)** Control or *TP53* knockout 22Rv1 cells were transfected with siRNA targeting *SP1* or scrambled control, followed by *CD276* mRNA expression analysis using qPCR ( $n = 4$  per group). **(H)** Overexpression of Sp1 in LNCaP, DU145 and 22Rv1 cells, followed by determination of SP1 (left;  $n = 4$  per group) and B7-H3 (right). Data represent the mean  $\pm$  SD. One-way ANOVA with Tukey's post hoc tests (D, F, and G) and Student's t-tests (H) were performed using GraphPad Prism version 9.2.0.. \*\*\*\*  $P < 0.0001$ . ns, not significant.

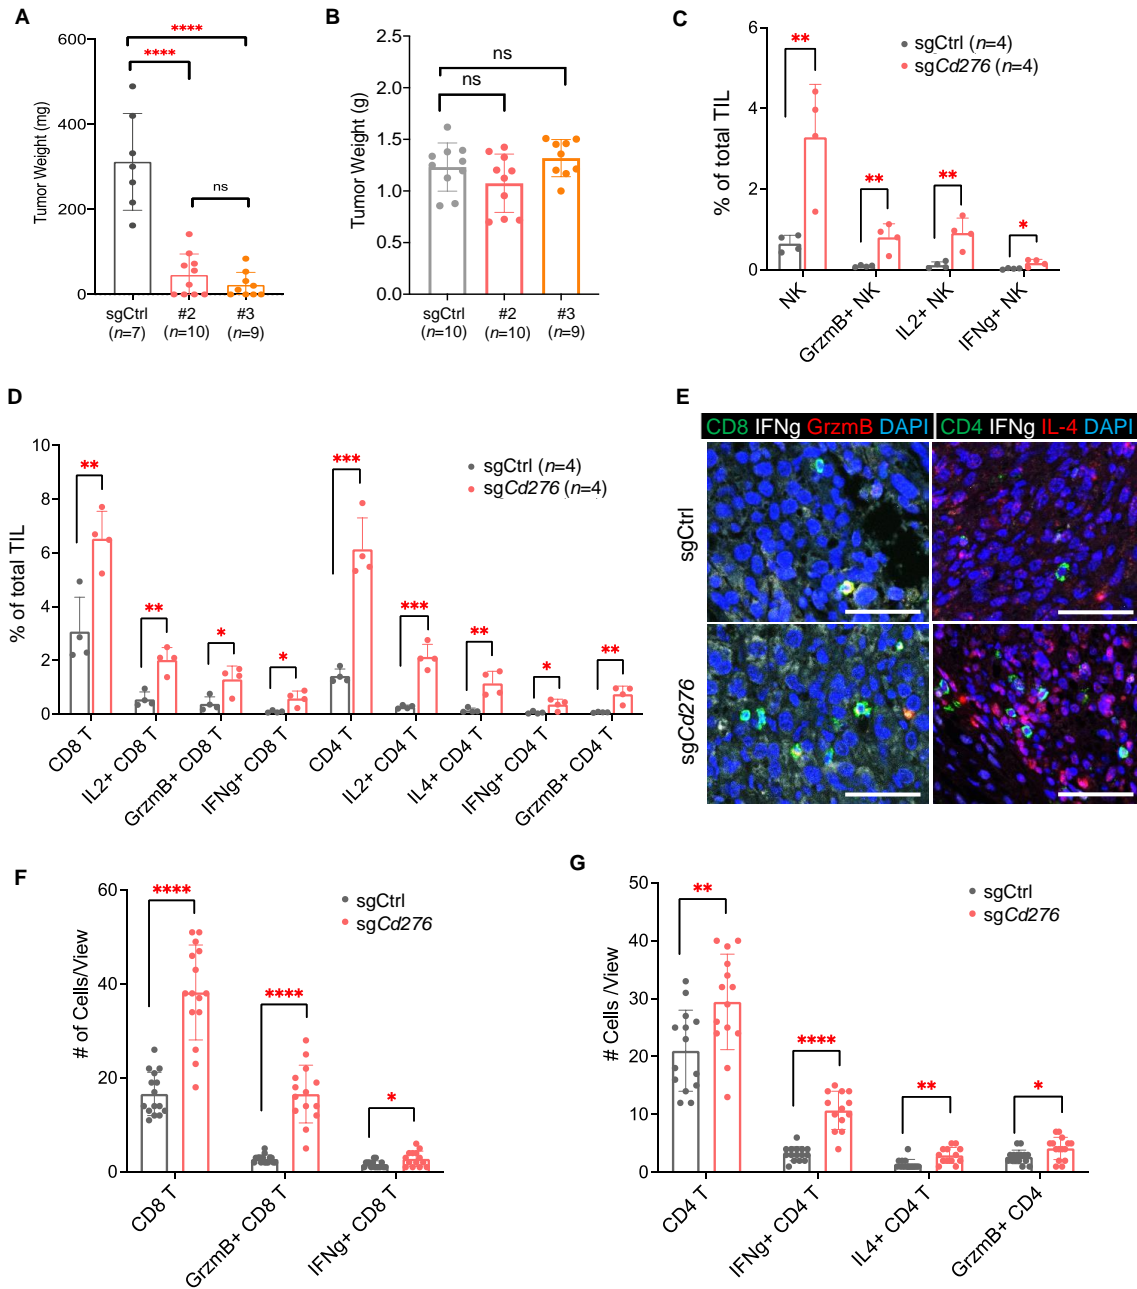

**Figure S3. B7-H3 promotes PTEN/p53-deficient tumors and immunosuppression**

(A) Tumor weight of control and B7-H3-depleted syngeneic tumors in immunocompetent C57BL/6 mice. (B) Weight of control and B7-H3-depleted tumors in immunodeficient NSG mice. (C, D) Analyses of cytokines in NK (C) and T (D) cells in control and B7-H3-depleted syngeneic tumors, determined by CyTOF. TIL: Tumor-Infiltrating Leukocytes. Data represent the mean  $\pm$  SD. (E, F, G) Representative images of multiplex IHC staining (E) and quantifications of CD8+ T (F) and CD4+ T cells (G) expressing indicated cytokines in control and B7-H3-depleted syngeneic tumors ( $n > 10$  individual views from 3 mice per group). Scale bar = 50  $\mu$ m. Left panel in E: Green, CD8a; White, IFNg; Red, GrzmB; Blue, DAPI. Right panel in E: Green, CD4; White, IFNg; Red, IL-4; Blue,

DAPI. Data represent the mean  $\pm$  SD. One-way ANOVA with Tukey's post hoc tests was performed using GraphPad Prism version 9.2.0.. \* $p < 0.05$ , \*\* $p < 0.01$ , \*\*\* $p < 0.001$ , \*\*\*\* $p < 0.0001$ . ns, not significant.

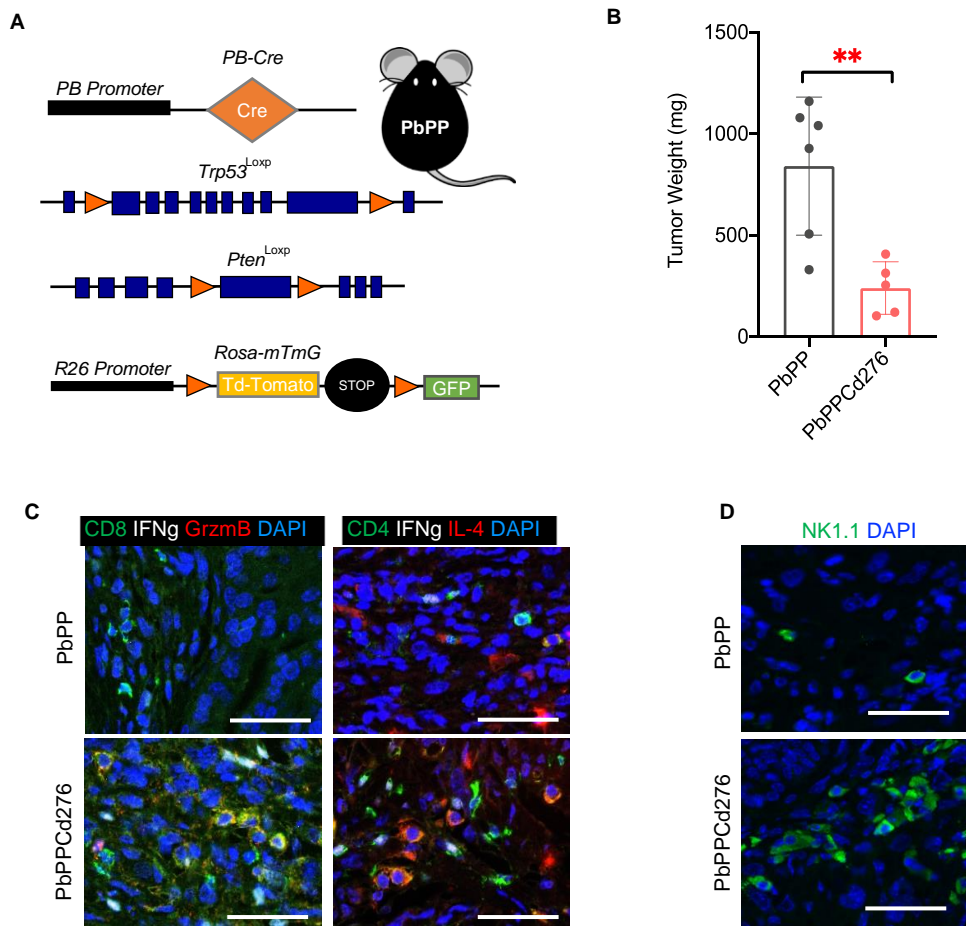

**Figure S4. Prostate-specific Cd276 deletion GEMM model revealed B7-H3's impact on cancer progression**

(A) GEMM model design: conditional knockout (KO) alleles of *Pten<sup>Loxp</sup>*, and *Trp53<sup>Loxp</sup>* were crossed with prostate-specific *PB-Cre* and *Rosa-mTmG* to establish *PB-Cre; Pten<sup>L/L</sup>; Trp53<sup>L/L</sup>* (*PbPP*) GEMM model. (B) Weight of prostate tumors from *PbPP* ( $n = 6$ ) and *PbPPCd276* ( $n = 5$ ) mice at five months of age.  $**P < 0.01$  (C) Multiplex IHC staining and representative images of CD8 T, CD4 T cells, and cytokines in prostate tumors from *PbPP* and *PbPPCd276* mice. Scale bar = 50  $\mu$ m. Left panel: Green, CD8a; White, IFN $\gamma$ ; Red, GrzmB; Blue, DAPI. Right panel: Green, CD4; White, IFN $\gamma$ ; Red, IL-4; Blue, DAPI. (D) IF staining and representative images of NK cells in *PbPP* and *PbPPCd276* tumors. Scale bar = 50  $\mu$ m. Green, NK1.1+; Blue, DAPI Student's t-tests were performed using GraphPad Prism version 9.2.0.  $** P < 0.01$ .

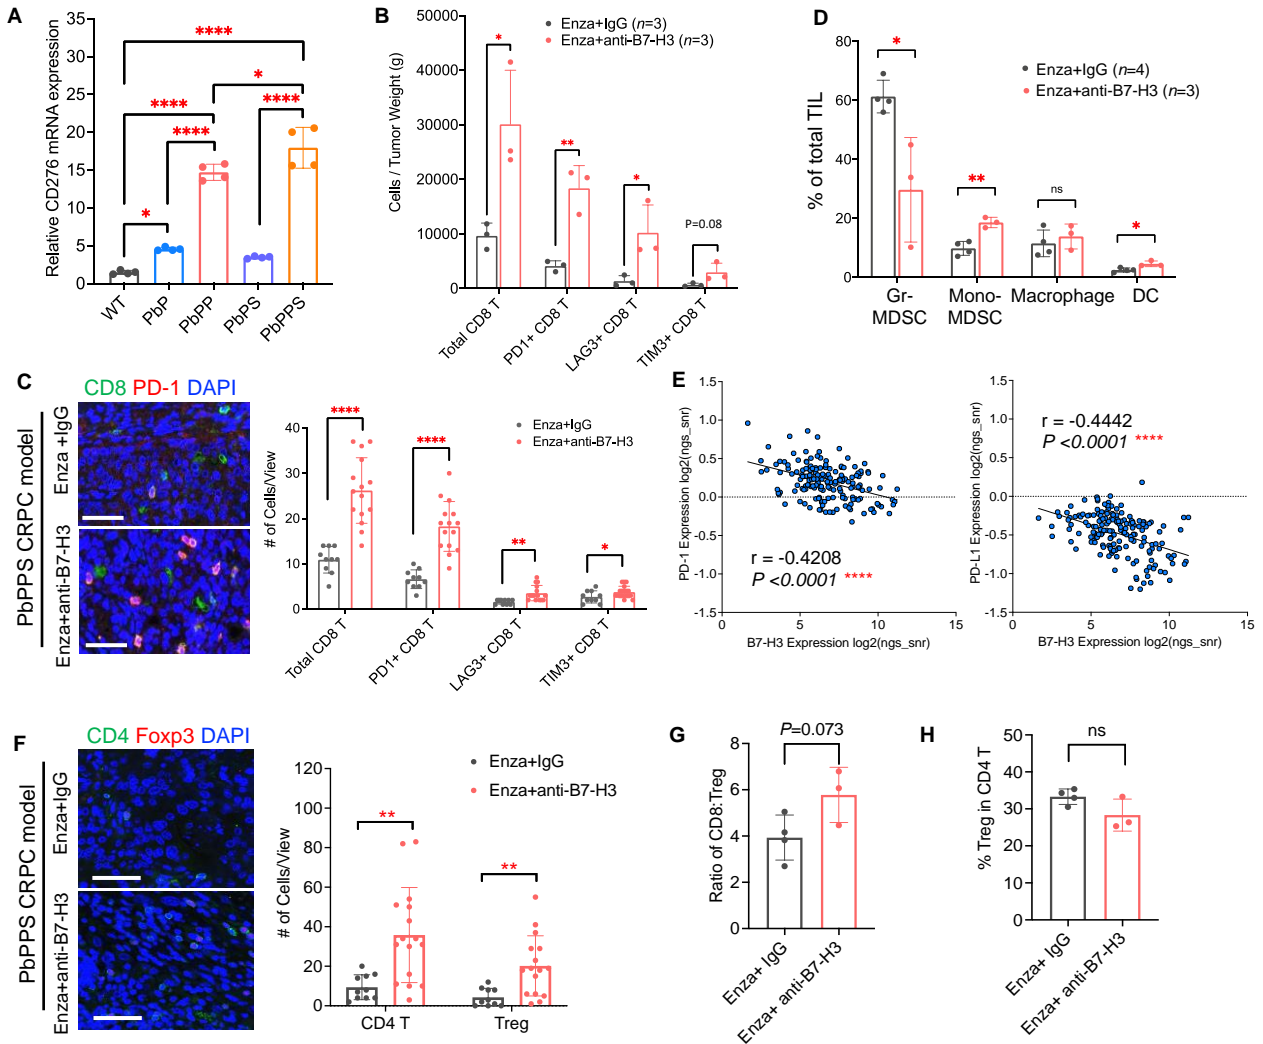

**Figure S5. Effects of B7-H3-blocking mAb in preclinical models of PTEN/p53-deficient CRPC**

(A) B7-H3 expression in normal prostate (WT) and prostate tumors from PbP, PbPP, *PB-Cre*; *Pten*<sup>L/L</sup>; *Smad4*<sup>L/L</sup> (PbPS), and *PB-Cre*; *Pten*<sup>L/L</sup>; *Trp53*<sup>L/L</sup>; *Smad4*<sup>L/L</sup> (PbPPS) mice (*n* = 4 per group), as determined by qPCR. (B) Flow cytometry analysis of CD8 T and exhaustion markers in syngeneic tumors treated with Enza in combination with IgG or anti-B7-H3 (*n* = 3 per group). (C) Representative multiplex IHC staining and quantification of total CD8 T (CD8a+) and exhausted CD8 T cells (PD1+/LAG3+/TIM3+) in PbPPS CRPC tumors after combination treatment. Green, CD8; Red, PD-1; Blue, DAPI. Scale bar = 50  $\mu$ m. *n* >10 individual views from 3 mice per group. Data represent the mean  $\pm$  SD. (D) Quantification of tumor-infiltrating myeloid cells in syngeneic tumors treated with Enza in combination with IgG or anti-B7-H3, determined by CyTOF. TIL: Tumor-Infiltrating Leukocytes. (E) Pearson correlations of B7-H3 expression with PD-1 (left) or PD-L1 (right) expression in human metastatic prostate tumors (Brady dataset, [29]). Pearson correlation coefficient (*r*) and *P* values are shown. (F) IF staining and quantification of CD4 T

(CD4+) and Treg (CD4+/Foxp3+) cells in PbPPS CRPC tumors after combination treatment. Green, CD4; Red, Foxp3; Blue, DAPI. Scale bar = 50  $\mu$ m. Data represent the mean  $\pm$  SD of >10 individual views. **(G,H)** The ratio of CD8 T to Treg **(G)** and the percentage of Treg **(H)** in total CD4 T in syngeneic tumors treated with Enza in combination with IgG ( $n = 4$ ) or anti-B7-H3 ( $n = 3$ ), determined by CyTOF. Data represent the mean  $\pm$  SD. One-way ANOVA with Tukey's post hoc tests (A) and student's t-tests (B, C, D, F, G, and H) were performed using GraphPad Prism version 9.2.0. \* $P < 0.05$ , \*\*  $P < 0.01$ , \*\*\*\*  $P < 0.0001$ . ns, not significant.

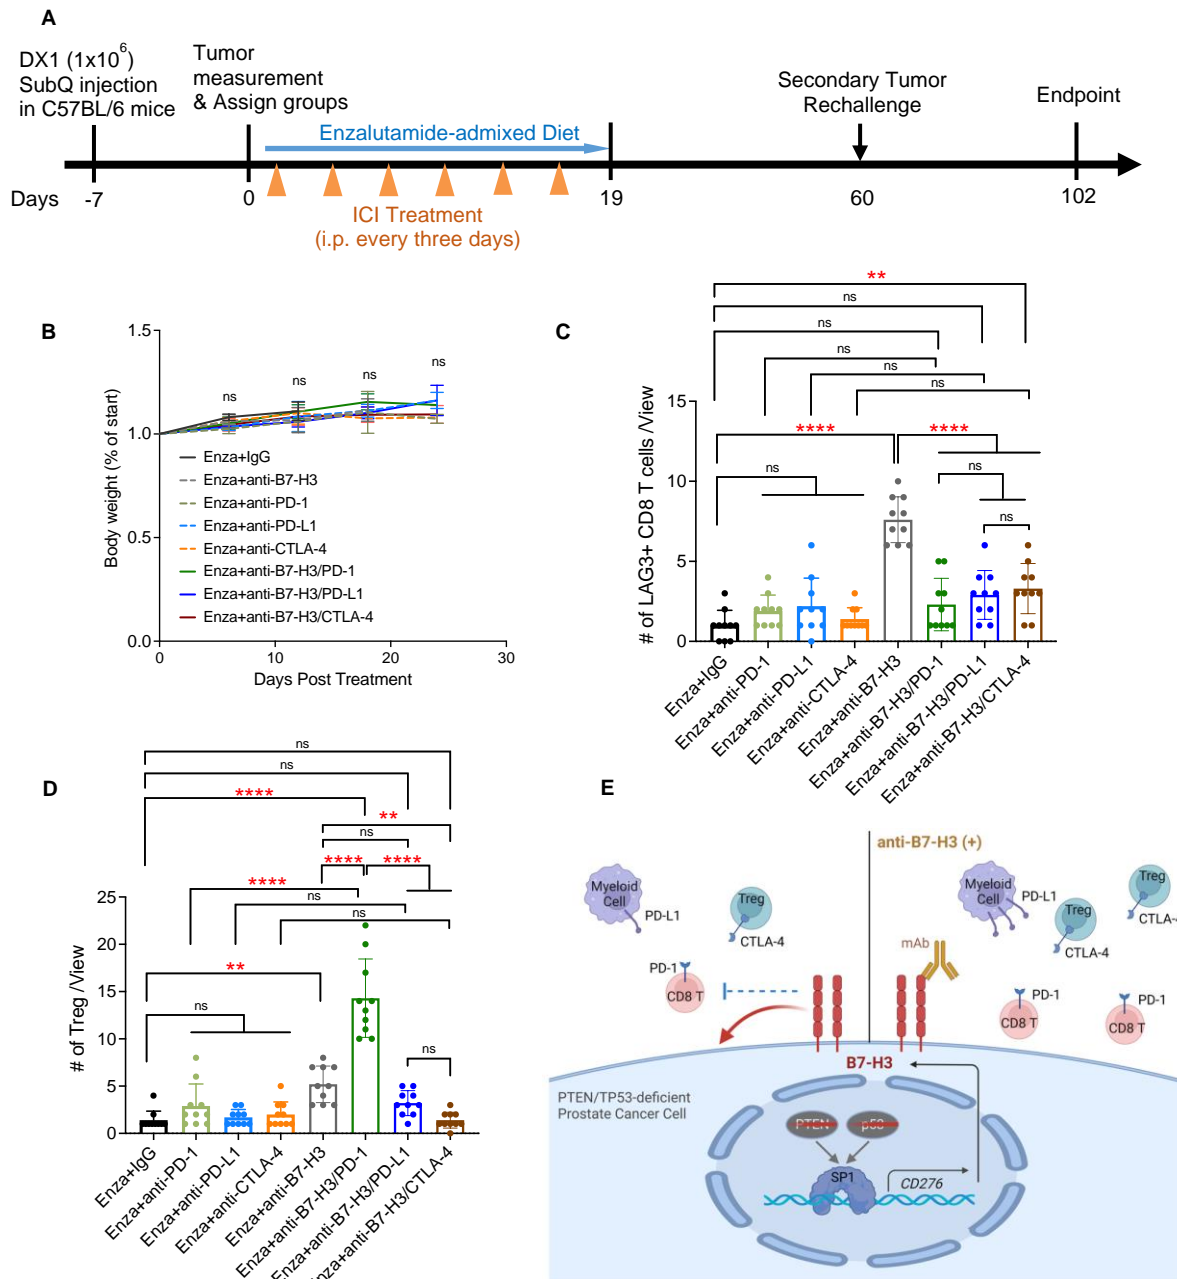

**Figure S6. B7-H3 inhibition combined with PD-L1 or CTLA-4 blockade achieves durable anti-effects in PTEN/p53-deficient CRPC**

(A) Schematics of the treatment design using the syngeneic CRPC model. Enzalutamide-resistant DX1 ( $1 \times 10^6$ ) cells were subcutaneously injected into one flank of C57BL/6 male mice. One week later, tumor volumes were measured by calipers, and mice were randomly assigned to treatment groups: Enza in combination with IgG, anti-B7-H3, anti-PD-1, anti-PD-L1, anti-CTLA-4, anti-B7-

H3/PD-1, anti-B7-H3/PD-L1, and anti-B7-H3/CTLA-4. For secondary tumor rechallenge, DX1 ( $1 \times 10^6$ ) cells were subcutaneously injected into another flank of tumor-free mice on Day 60. ICI: immune checkpoint inhibitors. The blue line indicates the duration of Enza treatment; orange triangles indicate drug administrations. **(B)** Changes in body weight of tumor-bearing mice during treatment ( $n = 4$  per group). **(C,D)** LAG3<sup>+</sup> CD8 T **(C)** and Treg **(D)** cells in tumors treated with single agents or combinations, determined by multiplex IHC. Data represent the mean  $\pm$  SD of 10 individual views. One-way ANOVA with Tukey's post hoc tests was performed using GraphPad Prism version 9.2.0. \*\*  $P < 0.01$ , \*\*\*  $P < 0.001$ , \*\*\*\*  $P < 0.0001$ . ns, not significant. **(E)** Schematic model: B7-H3, encoded by the *Cd276* gene, is a promising therapeutic target in PTEN/TP53-deficient prostate cancer. PTEN and p53 pathways negatively regulate B7-H3 expression by suppressing transcriptional factor Sp1. In PTEN/TP53-deficient tumors, Sp1 is activated and induces transcription of the *CD276* gene (bottom). The elevated B7-H3 promotes tumor progression and causes the suppression of cytotoxic T cells (CD8 T) in the tumor microenvironment (left). Inhibition of B7-H3 with monoclonal antibody (anti-B7-H3 mAb) increases the infiltration of cytotoxic T cells, but its anti-tumor effect is hindered by the enriched regulatory T cells (Treg) and upregulated PD-L1 expression in myeloid cells in the tumor microenvironment (right). Combining B7-H3 inhibition with the blockade of PD-L1 or CTLA-4 can achieve durable anti-tumor effects in PTEN/TP53-deficient prostate cancer. The schematic figure was generated by BioRender.
